# Supplementary material for: Antitumor activity of the multikinase inhibitor regorafenib in patient-derived xenograft models of gastric cancer
Source: Springer Nature journal article supplement (doi:10.1186/s13046-015-0243-5), 2015-10-28
Supplement: MOESM1 [file 9778050]

Supplementary Table 1. Tumor xenograft model histology and mutation status

---

| <b>Xenograft model</b> | <b>Histological features</b> | <b>Mutation status</b>                         |
|------------------------|------------------------------|------------------------------------------------|
| GC09-0109              | Tubular                      | <i>PDGFRA-D842_S847&gt;EA</i>                  |
| GC28-1107              | More intestinal than diffuse | <i>FBX4-S8R; PIK3CA-H1047R</i>                 |
| GC22-0808              | Intestinal                   | <i>PIK3CA-E545G; KRAS-G13D</i>                 |
| GC30-0309              | Diffuse                      | <i>FBX4-G30N; TP53-R273C</i>                   |
| GC10-0608              | Mixed diffuse and intestinal | <i>TP53-R273C; TP53-R306</i>                   |
| GC17-0409              | Diffuse                      | <i>PDGFRA-D842_S847&gt;EA</i>                  |
| GC05-0208B             | Intestinal                   | <i>KRAS-G12A</i>                               |
| GC23-0909              | Diffuse                      | <i>BRAF-R444Q; KRAS-G12D;<br/>PIK3CA-C420R</i> |

---
