# Supplementary material for: Antitumor activity of the multikinase inhibitor regorafenib in patient-derived xenograft models of gastric cancer
Source: Springer Nature journal article supplement (doi:10.1186/s13046-015-0243-5), 2015-10-28

Supplementary Figure 1. Dose-dependent effects of regorafenib 5, 10, and 15 mg/kg/day on tumor growth inhibition (A), tumor weight (B), and bodyweight (C) in xenograft model GC28-1107 (\*,  $P < 0.001$ ; N.S., not significant). Data shown are mean  $\pm$  standard error.

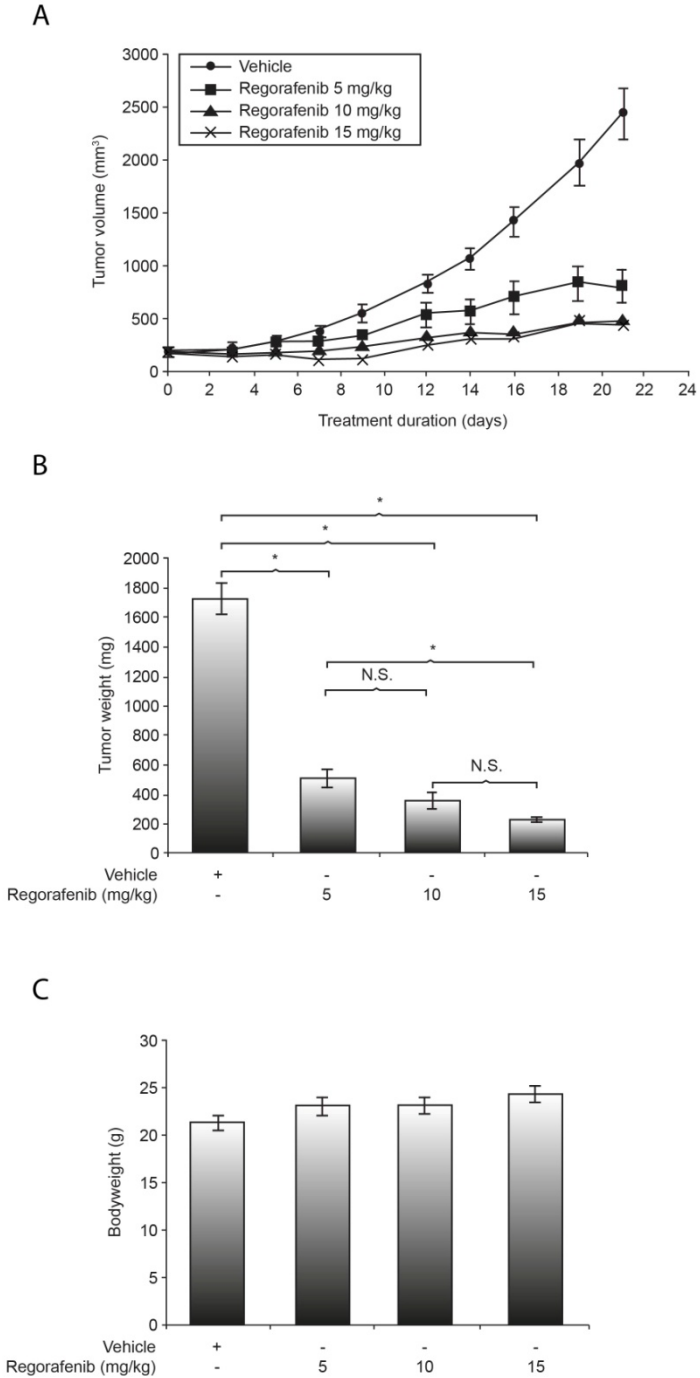

Supplement: MOESM2 [file 9778050]
