# Supplementary material for: Antitumor activity of the multikinase inhibitor regorafenib in patient-derived xenograft models of gastric cancer
Source: Springer Nature journal article supplement (doi:10.1186/s13046-015-0243-5), 2015-10-28

Supplementary Figure 2. Effects of regorafenib 10 mg/kg/day on tumor growth in xenografts GC22-0808, GC23-0909, GC30-0309, GC10-0608, and GC05-0208B. Data shown are mean  $\pm$  standard error.

GC22-0808

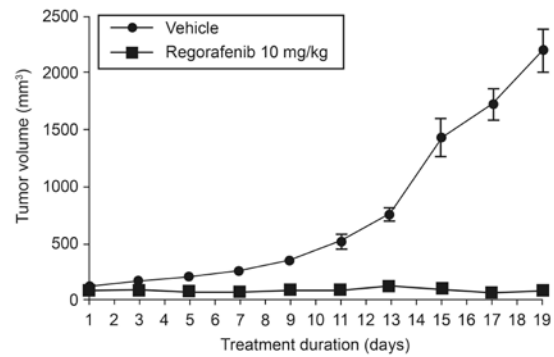

GC23-0909

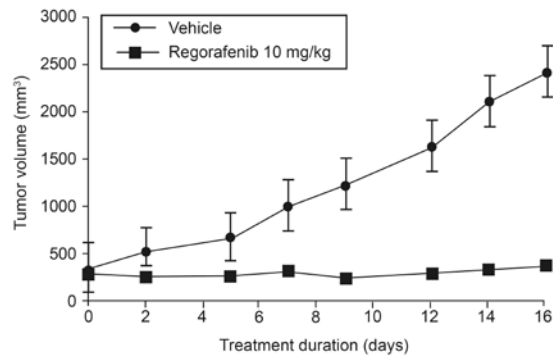

GC30-0309

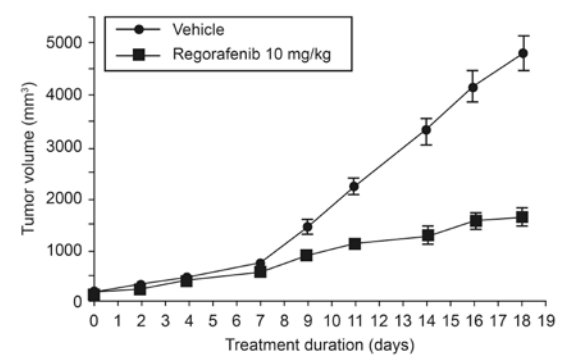

GC10-0608

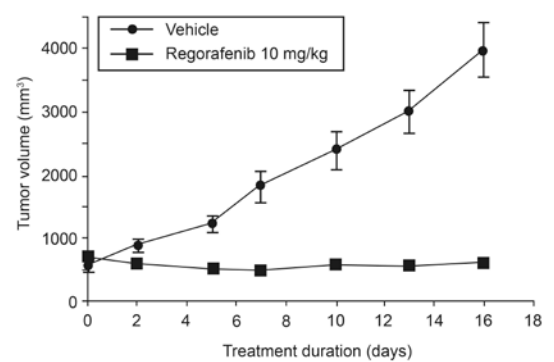

GC05-0208B

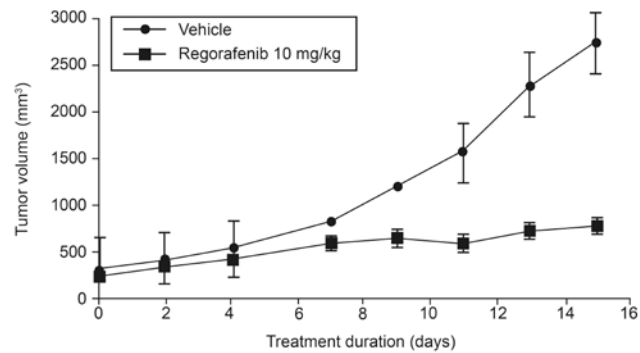

Supplement: MOESM3 [file 9778050]
