# Supplementary material for: Antitumor activity of the multikinase inhibitor regorafenib in patient-derived xenograft models of gastric cancer
Source: Springer Nature journal article supplement (doi:10.1186/s13046-015-0243-5), 2015-10-28

Huynh H, Ong R, Zopf D. Antitumor Activity of the Multikinase Inhibitor Regorafenib in Patient-Derived Xenograft Models of Gastric Cancer

Supplementary Figure 3. Effects of regorafenib on TIE2 expression in gastric cancer xenograft model GC05-0208B.

Vehicle

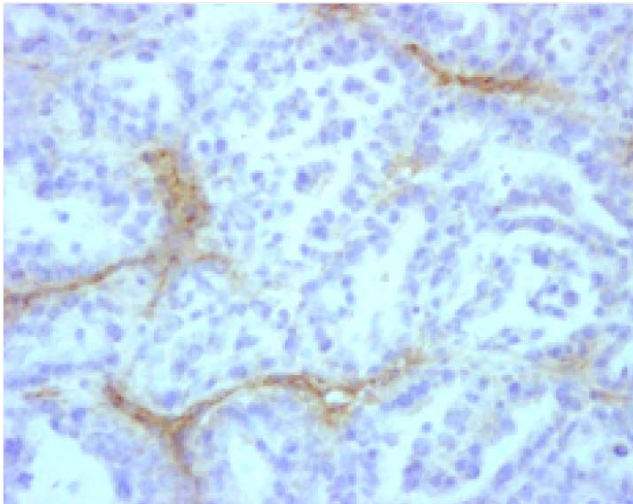

Regorafenib 10 mg/kg

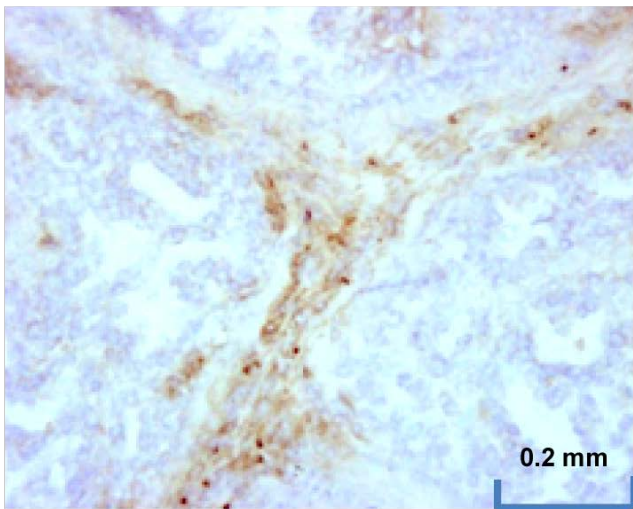

Supplement: MOESM4 [file 9778050]
